# Supplementary material for: Iron-Zinc Co-Doped Titania Nanocomposite: Photocatalytic and Photobiocidal Potential in Combination with Molecular Docking Studies
Source: MDPI journal article supplement (doi:10.3390/catal11091112), 2021-09-16
Supplement: s1 [file s1]

# Iron-Zinc Co-doped Titania Nanocomposite: Photocatalytic and Photobiocidal Potential in Combination with Molecular Docking Studies

Nadia Riaz <sup>1,2,\*</sup>, Debra Adelina Chia Siew Fen <sup>1</sup>, Muhammad Saqib Khan <sup>2</sup>, Sadia Naz <sup>3</sup>, Rizwana Sarwar <sup>4</sup>, Umar Farooq <sup>4</sup>, Mohamad Azmi Bustam <sup>1,\*</sup>, Gaber El-Saber Batiha <sup>5</sup>, Islam H. El Azab <sup>6</sup>, Jalal Uddin <sup>7</sup>, Ajmal Khan <sup>8,\*</sup>

<sup>1</sup> Chemical Engineering Department, Universiti Teknologi PETRONAS, 32610 Seri Iskandar, Malaysia; nadiariaz@gmail.com (N.R.), debchia991@gmail.com (DACSF), azmibustam@utp.edu.my (MAB)

<sup>2</sup> Department of Environmental Sciences, COMSATS University Islamabad, Abbottabad Campus, Abbottabad, 22060, Pakistan; muhammadsaqib@yahoo.com (MSK)

<sup>3</sup> Tianjin Institute of Industrial Biotechnology, Chinese Academy of Sciences, 300308, China; Saa-dia\_naaz@hotmail.com (S.N.)

<sup>4</sup> Department of Chemistry, COMSATS University Islamabad, Abbottabad Campus, Abbottabad, 22060, Pakistan; rizwanasarwar@cuiatd.edu.pk (R.S.), umarf@cuiatd.edu.pk (U.F.)

<sup>5</sup> Department of Pharmacology and Therapeutics, Faculty of Veterinary Medicine, Damanhour University, Damanhour 22511, AlBeheira, Egypt; gaberbatiha@gmail.com (G.E.B.)

<sup>6</sup> Food Science & Nutrition Department, College of Science, Taif University, P.O. box 11099, Taif 21944, Saudi Arabia.; i.helmy@tu.edu.sa (I.H.E.A.)

<sup>7</sup> Department of Pharmaceutical Chemistry, College of Pharmacy, King Khalid University, Abha 62529, Kingdom of Saudi Arabia. jalaluddinamin@gmail.com (J.U.)

<sup>8</sup> Natural and Medical Sciences Research Center, University of Nizwa, P.O. Box 33, Birkat Al Mauz, Nizwa 616, Sultanate of Oman; ajmalkhan@unizwa.edu.om (A.K.)

\* Correspondence: nadiariaz@gmail.com (N.R.); ajmalkhan@unizwa.edu.om (A.K.); azmibustam@utp.edu.my (MAB)

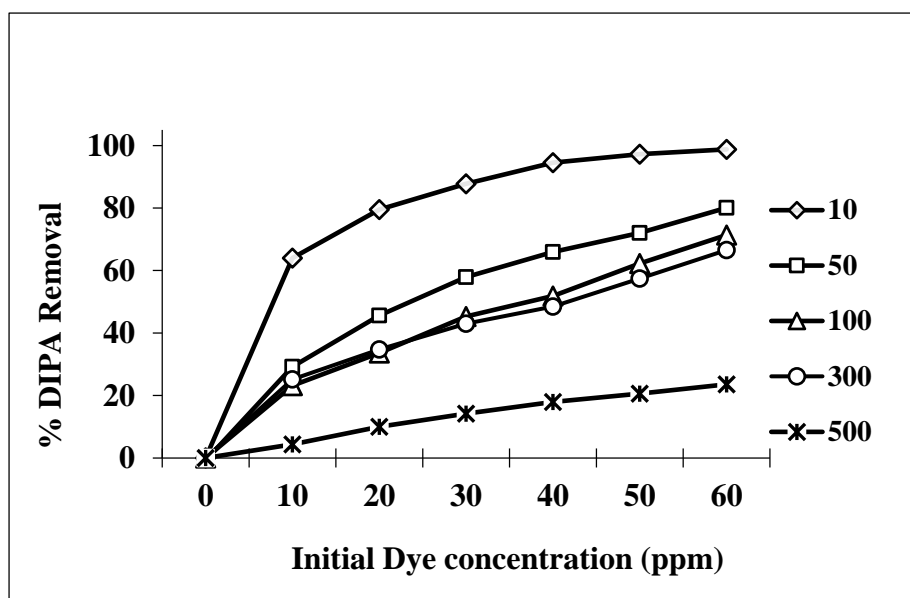

Figure S1. Effect of DIPA concentration versus corresponding irradiation time on % COD removal.

**Table S1.** Possible assignments of the FTIR peaks.

| Peaks (cm <sup>-1</sup> ) | Possible Assignment                 | Related Process Occurring                     |
|---------------------------|-------------------------------------|-----------------------------------------------|
| 600-800                   | Ti-O-Ti vibrations                  | Different vibration modes of TiO <sub>2</sub> |
| 1300-1400, 3400           | Stretching vibrations of O-H groups | Physically absorbed moisture                  |
| 1384                      | NO <sub>3</sub> <sup>-</sup>        | nitrate (NO <sub>3</sub> <sup>-</sup> ) group |

## 1. Nanocomposite Synthesis

### 1.1 Coprecipitation (CP) method

A series bimetallic photocatalysts with different Fe:Zn mass composition were prepared using TiO<sub>2</sub> as support via coprecipitation (CP) method. Appropriate amounts of metal salts were dissolved in distilled water, followed by the addition of metals. TiO<sub>2</sub> was added into the solution with continuous stirring for 1 h prior to precipitation with 0.25 M NaOH. The preparation temperature was maintained in the range from 8 to 10 °C. The final pH was kept at 14, and the mixture was aged for 1 day. The precipitates were filtered and dried in an oven at 75 °C overnight. The raw photocatalysts were ground into a fine powder, kept in an airtight glass bottle, and stored in a desiccator before calcination.

### 1.2 Wet impregnation (WI) method

Bimetallic photocatalysts with known total metal loading and Fe:Zn mass composition were prepared using wet impregnation (WI) method with TiO<sub>2</sub> as support. To prepare photocatalysts using WI method, support was added into the metal salt solution. The suspension was stirred for 1 hour before the solvent was evaporated in a water bath at 80 °C until a thick paste was obtained. This paste was then dried in an oven at 120 °C for 18 hours. The dried photocatalyst was ground with a mortar and pestle, kept in air-tight glass bottle (to avoid moisture) as raw photocatalyst, and stored in a desiccator at room temperature prior to calcination.

### 1.3. Sol-gel method

Fe-Zn/TiO<sub>2</sub> photocatalysts with different Fe:Zn mass composition were synthesized employing sol-gel method. Fe-Zn/TiO<sub>2</sub> sol solution (with required ratio of Fe:Zn) was prepared using sol-gel method by adding 15ml TTIP in 100ml Ethanol. Iron source was dissolved in ethanol as required. The solution was stirred continuously while adding 1M HCl (2.0ml) at room temperature until a transparent sols were obtained. Dried in oven at 100 °C and raw photocatalysts were ground into a fine powder, kept in an airtight glass bottle, and stored in a desiccator before calcination.

## 2. Schematic representation of the formation mechanism

### 3.3.1.2 Flowchart representation for preparation of photocatalysts

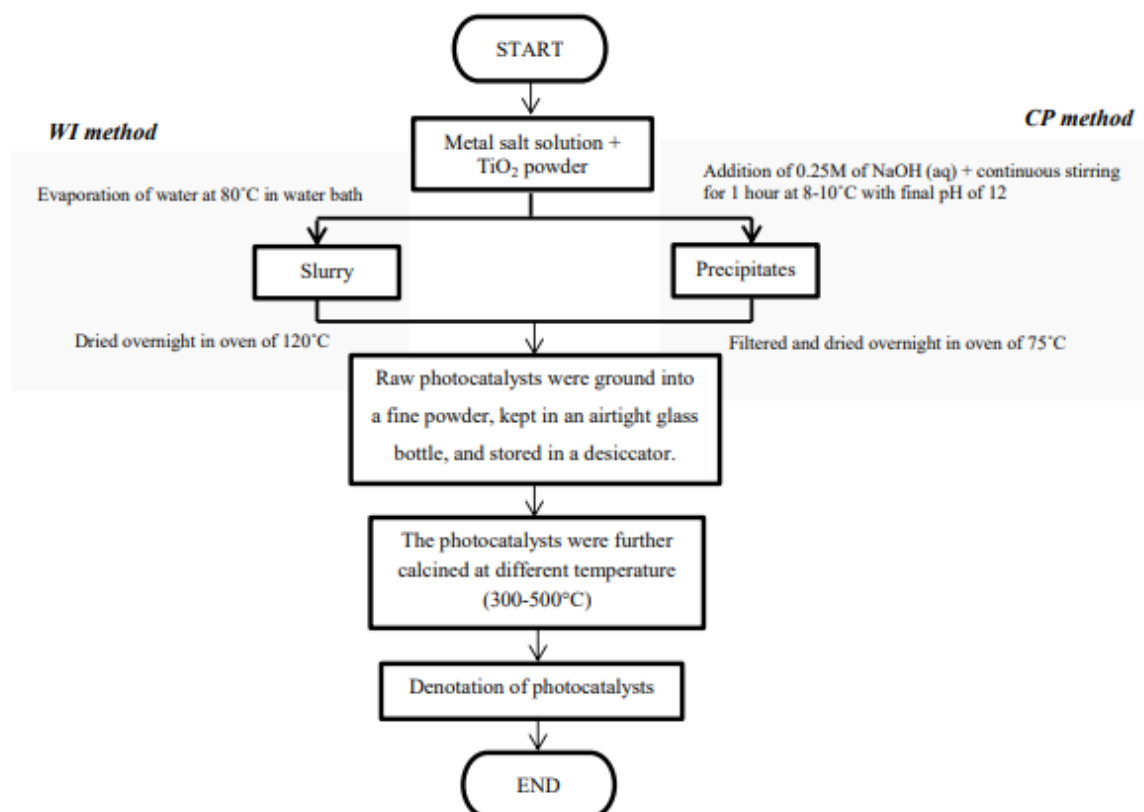

Figure S2. Schematic representation of the formation mechanism.

| Analysis                                         | Model                                            | Function                                             |
|--------------------------------------------------|--------------------------------------------------|------------------------------------------------------|
| Thermogravimetric Analysis (TGA)                 | Pyris 1                                          | Thermal stability                                    |
| Fourier-Transformed Infrared Spectroscopy (FTIR) | Perkin Elmer Spectrum one FTIR spectrophotometer | Species (functional group) identification            |
| X-ray Diffraction (XRD)                          | Bruker D8 Advance Diffractometer                 | Crystal phases and Crystallite sizes                 |
| Field Emission electron microscopy (FESEM)       | Supra55VP                                        | Morphology                                           |
| N <sub>2</sub> -physisorption (BET)              | BELSORP, Japan                                   | Surface area, pore volume, and average pore diameter |

Figure S3. Instruments used for characterization of the photocatalysts.

## 3. Raw data collected during the experimentation.

Fe-Zn/TiO<sub>2</sub>

→ TiO<sub>2</sub> + ionic charge (Pre 6.25)

→ FeTiO<sub>3</sub> Neutral

2n/TiO<sub>2</sub> initial pH final pH

FeTiO<sub>3</sub> + DIPA 10.67

DIPA + DIPA 10.54

Fe-Zn/TiO<sub>2</sub> (wt, SG, CP)

metal composition (0.012n, 0.1Fe:0.42n, 0.2Fe:0.32n, 0.3Fe:0.22n, 0.4Fe:0.12n, and 0.5Fe:0.02n)

Calculation: 300, 300, 400, 500 °C

Parameters: Fe:Zn ratio, catalyst, liquid intensity

Characterization: Dose 16A, FTIR, BET, SEM, TEM, XRD, DRS

New catalyst → (2n, Fe-Zn/TiO<sub>2</sub>)

Meeting Aspetee

→ Reactor.

Temp. Section ← 10th July, 2014

\* Wire mesh to hold membrane filter.

\* sensor to automatically handle the codes

\* level inside reactor.

\* LED light.

1 LED = 10 watt

16 " = 160 watt.

\* dosing pump - metering

\* → Residence time (+)

→ mass flow meter / controller (expensive)

Sol. A

TTIP - 3ml

Water - 10ml

Ethanol - 25ml

HNO<sub>3</sub> (2,3 drops)

1 ml - dropwise

Procedure:

Sol. A.

EtOH + Water

- then add TTIP

- adjust pH

Stir vigorously for 30 min (color change)

colorless

Sol. B

Fe(NO<sub>3</sub>)<sub>3</sub> - 25 required

Water - 20 ml

Ethanol - 20 ml

Stirring

↓

Take in buret then dropwise add to Sol. A.

0.1 M HNO<sub>3</sub>

Molar mass of HNO<sub>3</sub> = ~63 gms/L = 1M

67% HNO<sub>3</sub> (assuming it is 67% w/v)

means you have 67 gm in 100 ml

To make 0.1M you need 63 g/L

How to get 63 grams from 67 g/100ml.

9.4 ml of 67% HNO<sub>3</sub> diluted up to 1L = 0.1M

65% HNO<sub>3</sub> contains 65 ml HNO<sub>3</sub>/100 ml solution.

means

650 ml / 1L

HNO<sub>3</sub> density = 1.41 g/L

formula wt HNO<sub>3</sub> = 63.013 g/mol

Finding mass of 650 ml - multiply

= 650 ml x density (650 x 1.41)

= 916.5 g HNO<sub>3</sub> / 1L solution

which gives a molarity 916.5/63.013 = 14.545 M

V<sub>1</sub> M<sub>1</sub> = V<sub>2</sub> M<sub>2</sub>

V<sub>1</sub> (14.545) = 1 x 1

so 1/14.545 = 0.0688 L = 68.8 ml

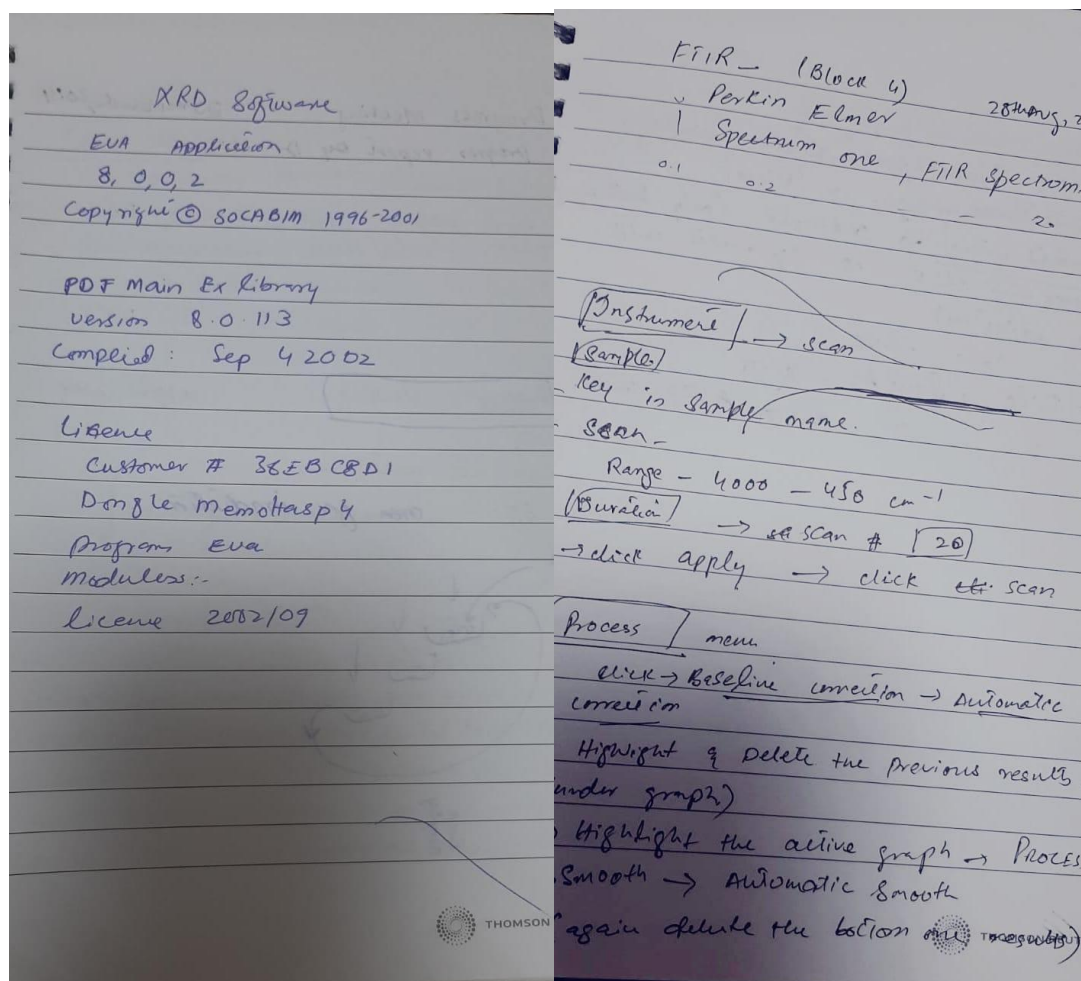

\* **Titanium (IV) isopropoxide (97%) (TIP)**  
 205273 Aldrich  
 Formula:  $Ti(OCH(CH_3)_2)_4$  - MW = 284.22  
 \* 20L = 1015.03 RM  
 500mL = 359.51 RM

**Titanium (IV) isopropoxide (>97.0%)**  
 87560 Aldrich  
 $Ti(OCH(CH_3)_2)_4$  MW = 284.22  
 100 mL = 265.01 RM  
 500 mL = 1325.05 RM

**Titanium (IV) isopropoxide (99.999%)**  
 377996 Aldrich  
 $Ti(OCH(CH_3)_2)_4$  MW = 284.22  
 5 mL = 231.61 RM  
 25 mL = 620.02 RM  
 100 mL = 1,937.56 RM

{ How many gm of NaOH to prepare }  
 { 250 ml solution of 0.25M }  
 - M = 0.25M  
 - sol. vol. = 250 ml  
 - NaOH(g) = ?  

$$\text{mole (NaOH)} = (\text{molarity NaOH})(L \text{ of NaOH})$$

$$= (0.25M)(0.250L)$$

$$= (0.25 \text{ mol NaOH/L})(0.250L)$$

$$= \dots \text{ mol NaOH}$$

convert the above mole NaOH to g of NaOH

$$\dots \text{ mole NaOH} (40.0g \text{ NaOH} / 1 \text{ mole NaOH})$$

$$= \dots g$$

or



**CP, DP & WI method**

→ CP photocatalyst

WI CP DP

metal salts + DW

↓

stirring

↓

TiO<sub>2</sub>

↓

stirring (1h)

↓

precipitation using NaOH (0.25 M) (8-10°C) pH 8.5

↓

Aggins

↓

Aggins

↓

filtration

↓

drying

0.25 M NaOH (25g in 250ml, 5g in 500ml)

Drying to get a thick paste in water bath at 80°C

Aggins

filtration

drying

0.25 M NaOH (25g in 250ml, 5g in 500ml)

DEA

monomer mass: 117.16 g/mol

Chem Formula: CH<sub>3</sub>N(CH<sub>2</sub>CH<sub>2</sub>OH)<sub>2</sub>

DIPA - 0.0225 M

Reaction volume - 50 ml

TiO<sub>2</sub> (g) - 1 mg/ml

Reaction duration - 1 h

Sampling interval - 20 min

first sample - 10 min

THOMSON REUTERS
